# Supplementary material for: Controlled biomimetic silica formation using star-shaped poly(l-lysine)
Source: Royal Society of Chemistry journal article supplement (doi:10.1039/c2py20070h), 2012-01-01
Supplement: c2py20070h.pdf [file c2py20070h.pdf]

## Supporting Information

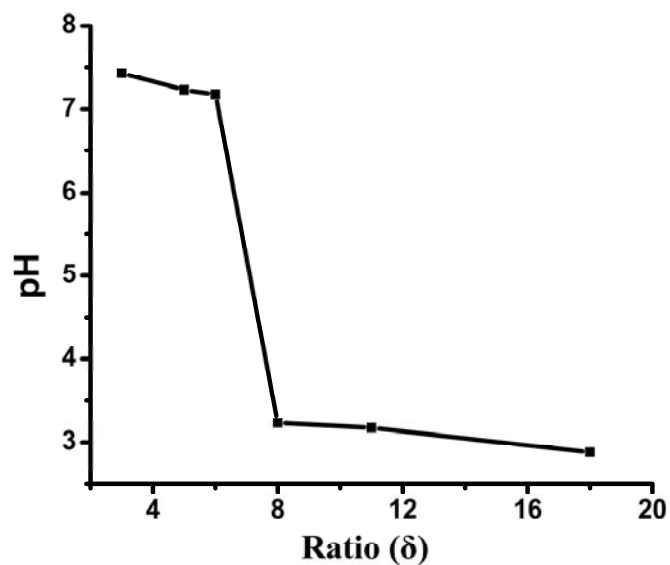

**Fig. S1** pH variation in the biomimetic reaction system as a function of  $\delta$  ratio

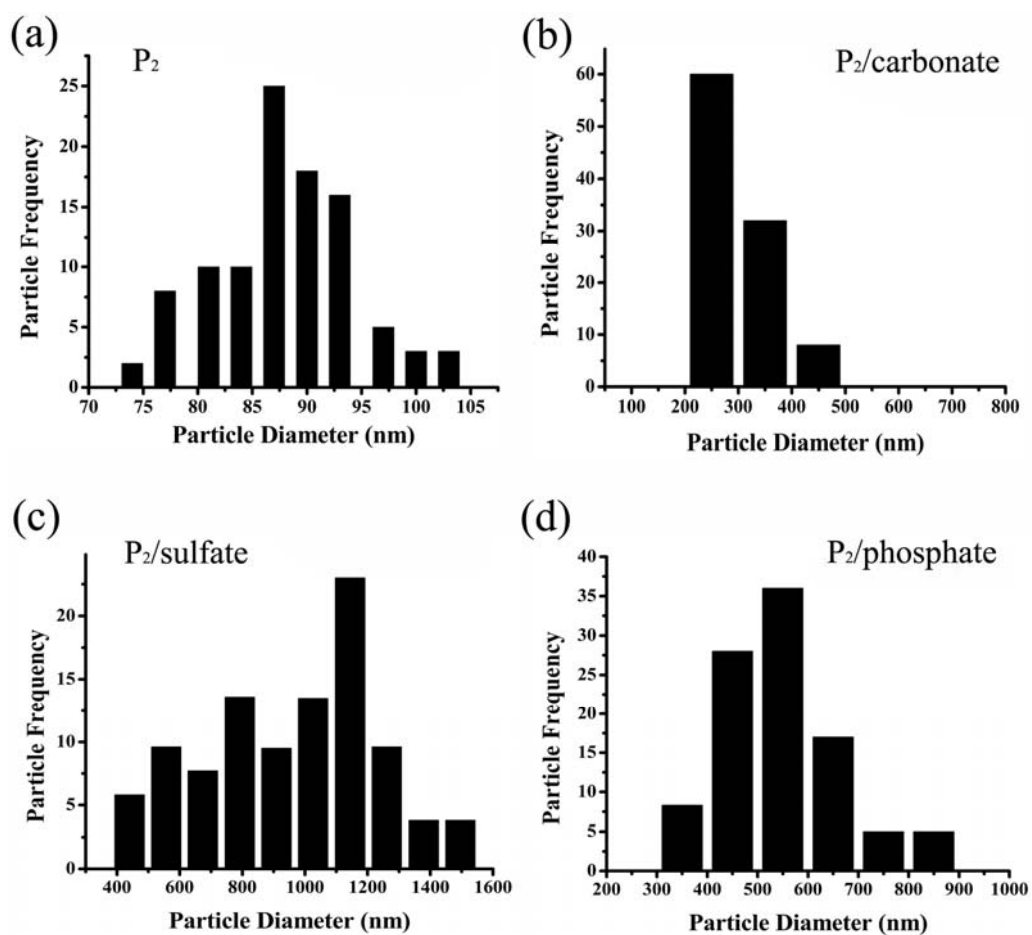

**Fig. S2** Apparent size distributions of the aggregates of (a)  $P_2$  in pure water, (b)  $P_2$ /carbonate, (c)  $P_2$ /phosphate, and (d)  $P_2$ /sulfate.

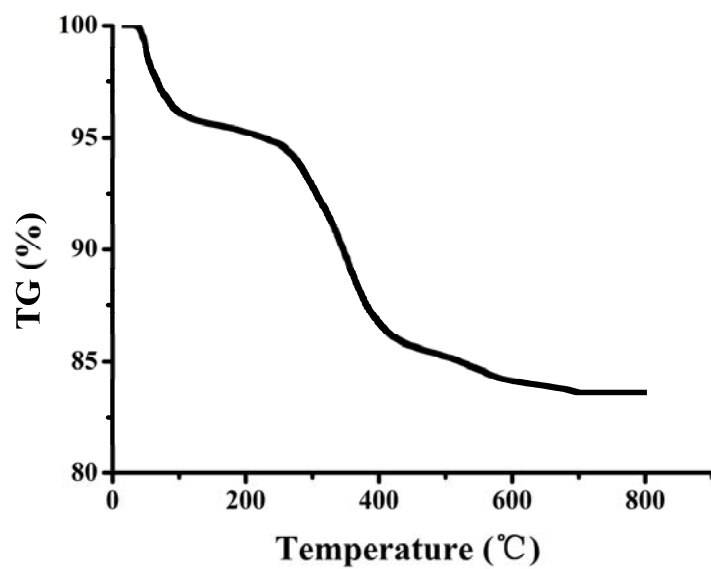

**Fig. S3** Thermogravimetric analysis (TGA) spectrum of **P<sub>2</sub>**/silica composites.
